# Supplementary material
Source: Springer Nature journal article supplement (https://www.springermedizin.de/resource/supplementary/13058_2010_2524_MOESM13_ESM.pdf/9701606)
Supplement: MOESM13 [file 9701606]

# Mature Luminal

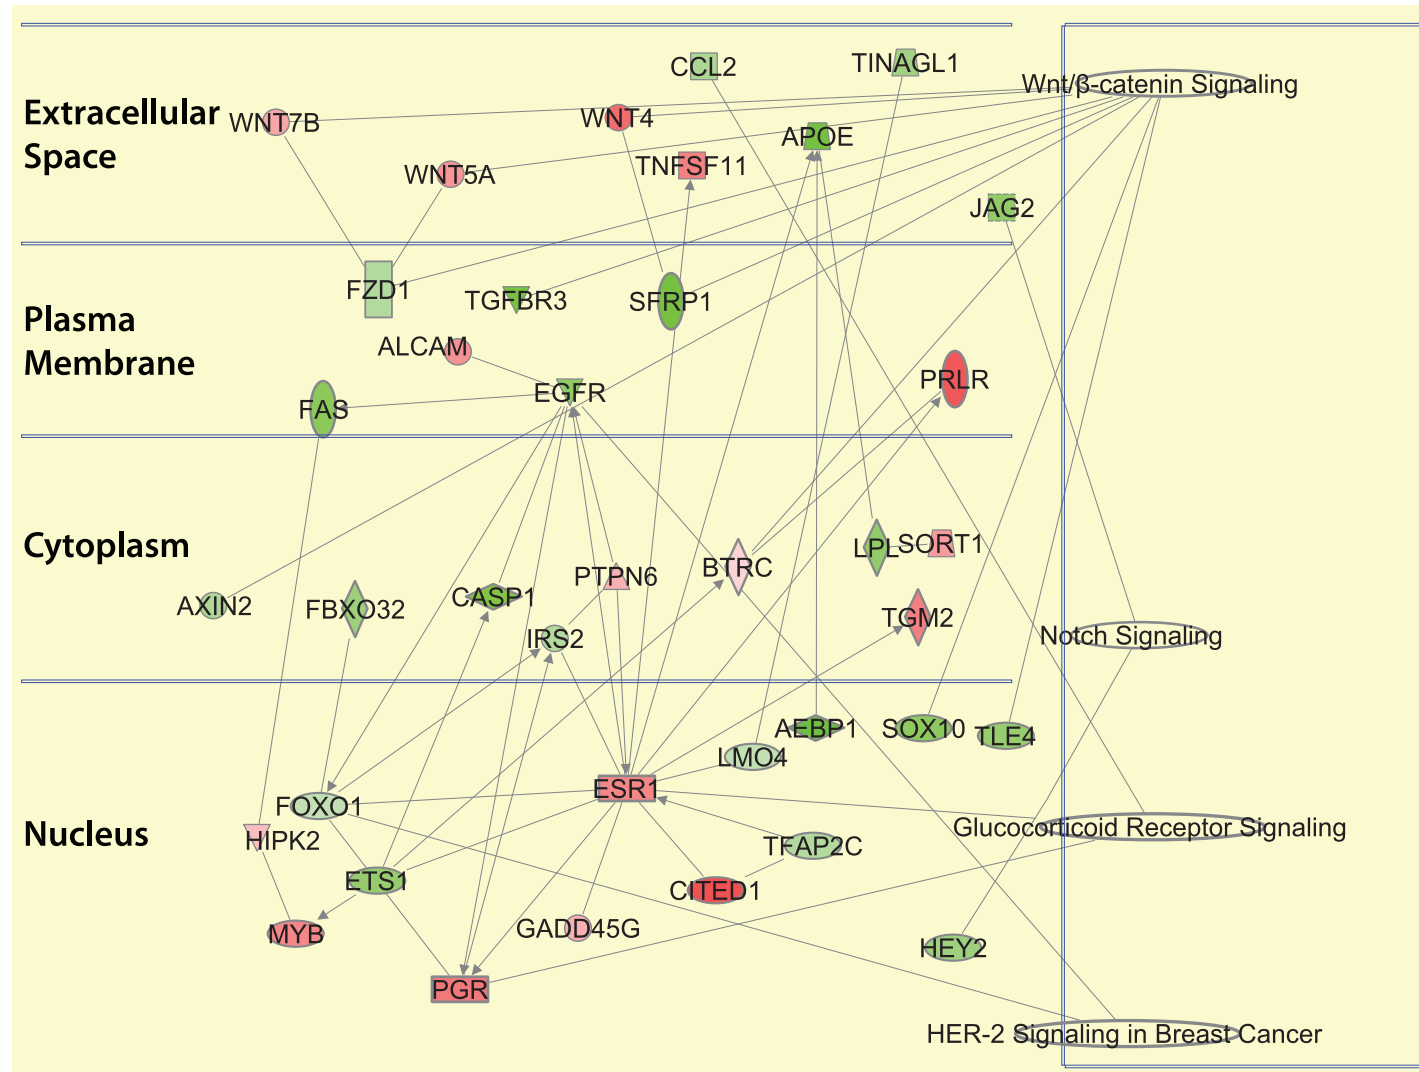

## Symbols

- Direct interaction
- Acts on
- Cytokine
- Growth factor
- △ Transporter
- Ligand-dependent nuclear receptor
- G-protein coupled receptor
- ◇ Peptidase
- ◇ Enzyme
- ▽ Kinase
- △ Phosphatase
- Transcription factor
- Transmembrane receptor
- Other
